# Supplementary material for: A novel upconversion luminescence turn-on nanosensor for ratiometric detection of organophosphorus pesticides
Source: Royal Society of Chemistry journal article supplement (doi:10.1039/c6ra05978c), 2016-01-01
Supplement: c6ra05978c1.pdf [file c6ra05978c1.pdf]

## Supporting information

### A novel upconversion luminescence turn-on nanosensor for ratiometric detection of organophosphorus pesticides

Shuailiang Wang,<sup>a,b</sup> Xiaobo Wang,<sup>a,b</sup> Xingxiang Chen,<sup>a,b</sup> Xiaozheng Cao,<sup>a,b</sup> Jing Cao,<sup>a,b</sup>  
Xiaofeng Xiong<sup>a,b</sup> and Wenbin Zeng<sup>\*a,b</sup>

<sup>a</sup> School of Pharmaceutical Sciences, <sup>b</sup> Molecular Imaging Research Center, Central South University, Changsha, 410013, PR China.

\*Corresponding author. Tel/Fax: 0086-731-82650459. E-mail address:  
wbzeng@hotmail.com

### Supplementary figures

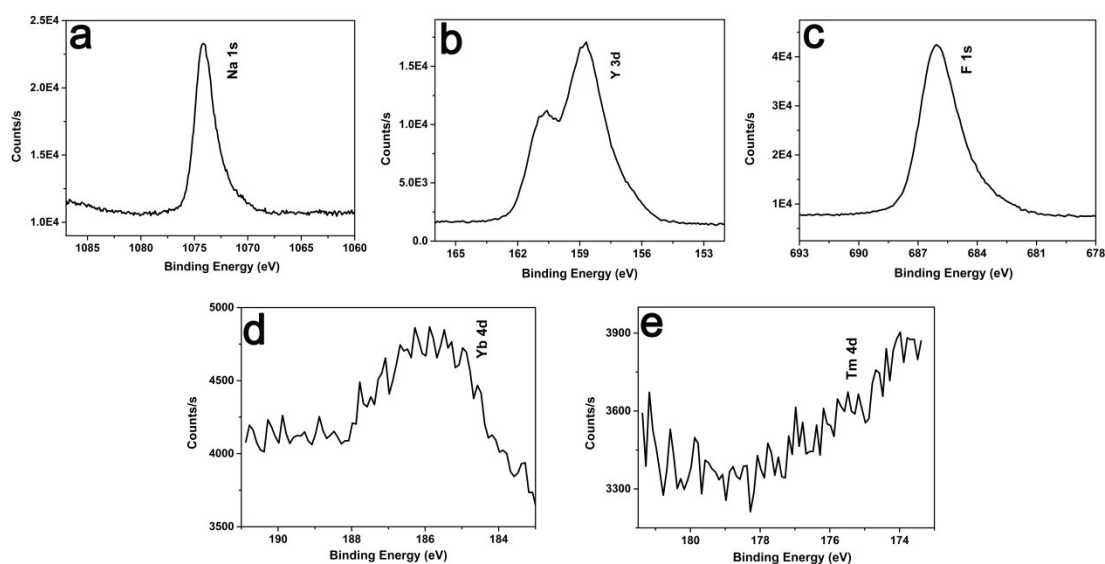

**Fig. S1** Narrow range XPS spectra of Na 1s, Y 3d, F 1s, Yb 4d and Tm 4d. Note that Tm was only doped with an amount of 0.1% in the core layer, thus the peak at its characteristic binding energy was very weak.

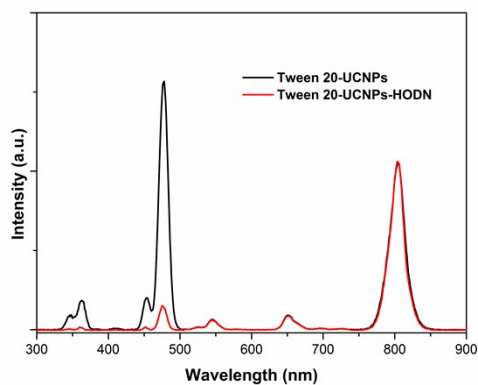

**Fig. S2** UCL spectra of Tween 20 modified UCNP before (black line) and after (red line) loaded with pesticide probe **HODN**.

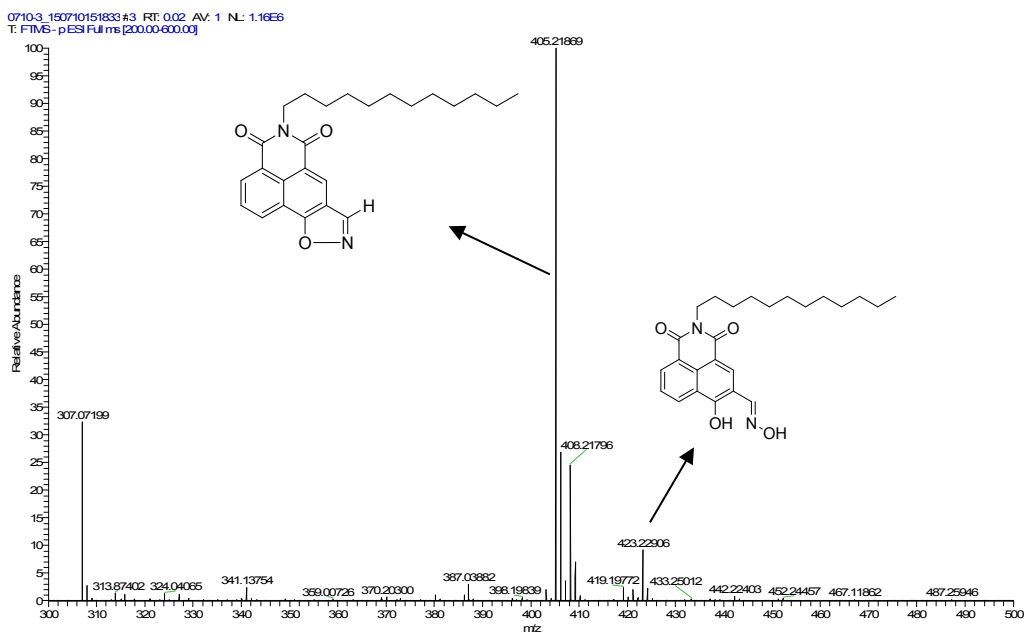

**Fig. S3** HR-MS spectrum analysis for the determination of the reaction mechanism between **HODN** and DCP.

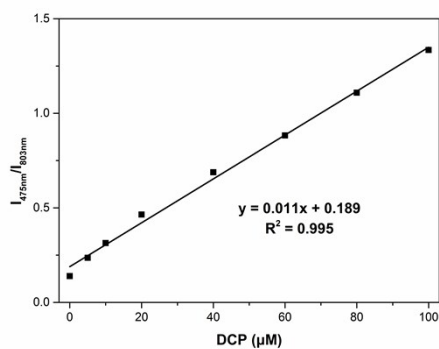

**Fig. S4** Linear plot of relative UCL increasing ( $I_{475\text{ nm}}/I_{803\text{ nm}}$ ) as a function of DCP concentration. The detection limit (LOD) was given by the equation  $\text{LOD} = 3S_0/S$ ; where 3 is the factor at the 99% confidence level,  $S_0$  is the standard deviation of the blank measurements ( $n = 8$ ), and  $S$  is the slope of the calibration curve.

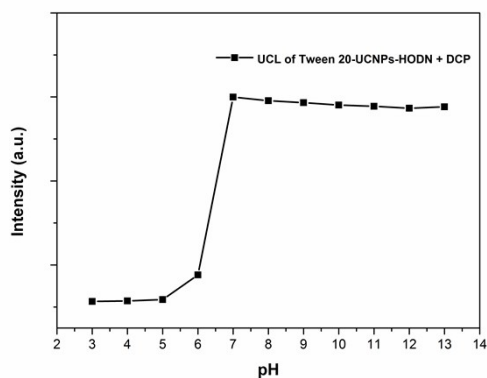

**Fig. S5** Evaluation of the sensing ability of Tween 20-UCNPs-HODN within the pH range of 3-13.

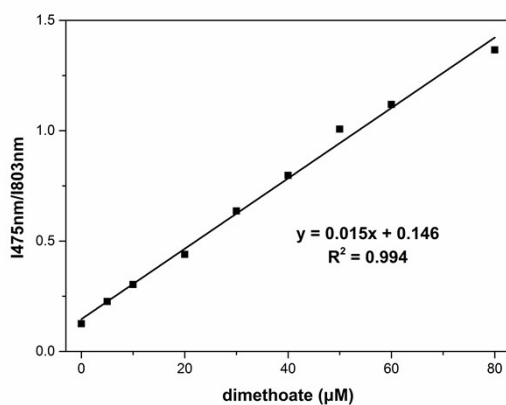

**Fig. S6** Linear plot of relative UCL increasing ( $I_{475\text{ nm}}/I_{803\text{ nm}}$ ) as a function of dimethoate concentration.

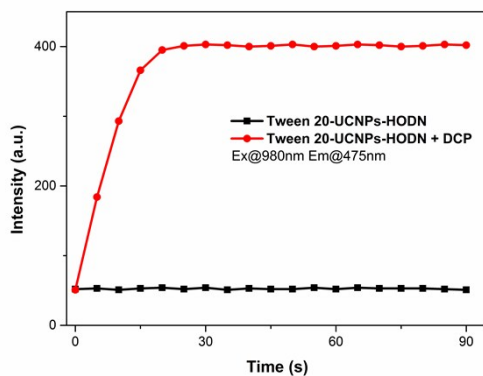

**Fig. S7** Time course of reaction of **Tween 20-UCNPs-HODN** ( $0.3\text{ mg mL}^{-1}$ ) with DCP ( $200\text{ }\mu\text{M}$ ) at  $25\text{ }^{\circ}\text{C}$  in PBS (pH 7.4, containing 20% DMF) solution.

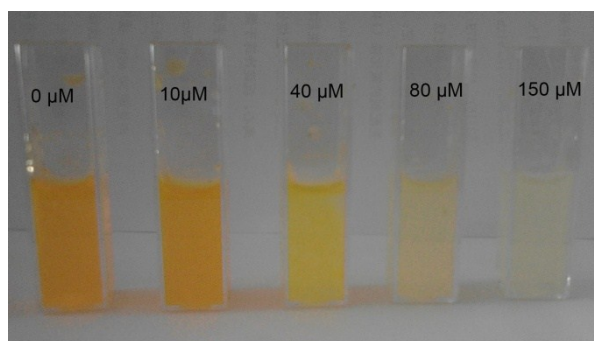

**Fig. S8** The photographs of **Tween 20-UCNPs-HODN** ( $0.3\text{ mg mL}^{-1}$ ) solution in presence of different concentration of DCP.

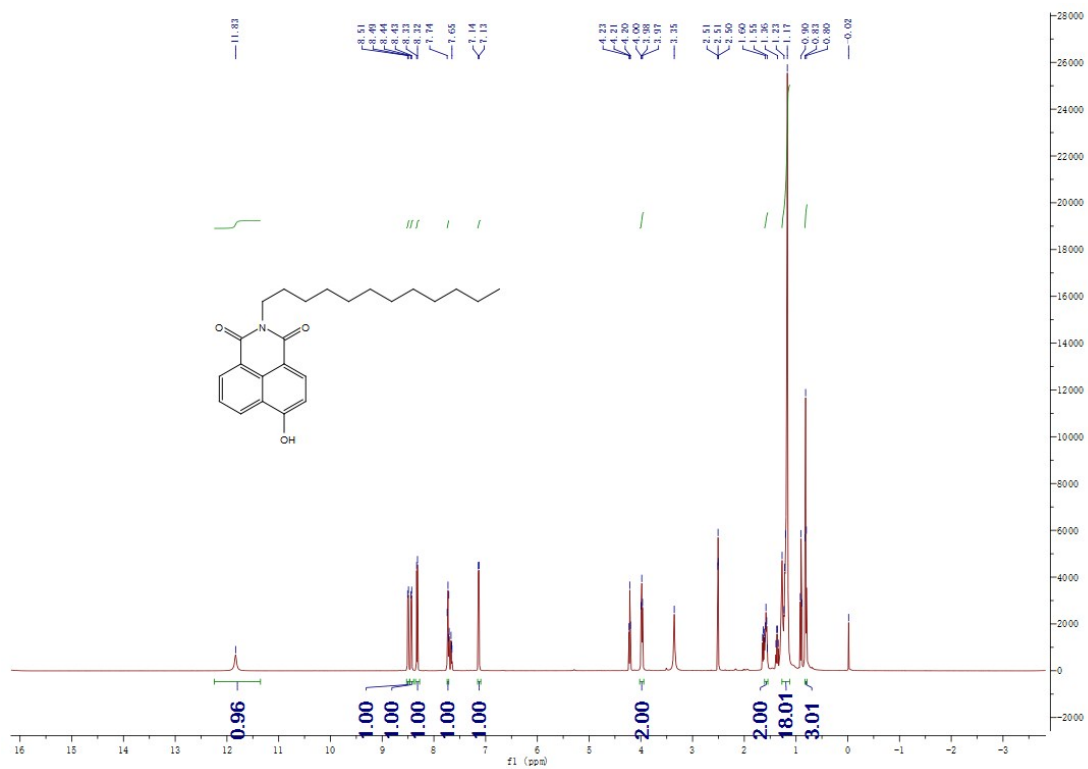

Fig. S9  $^1\text{H-NMR}$  spectrum of compound 3.

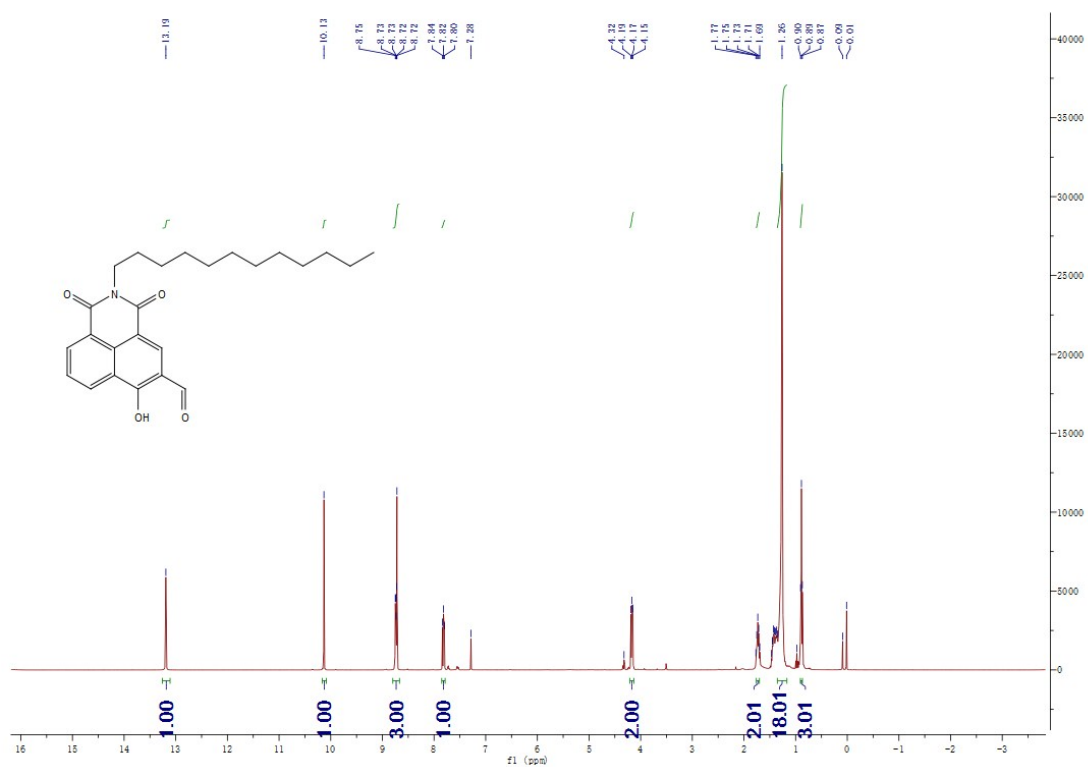

Fig. S10  $^1\text{H-NMR}$  spectrum of compound 4.

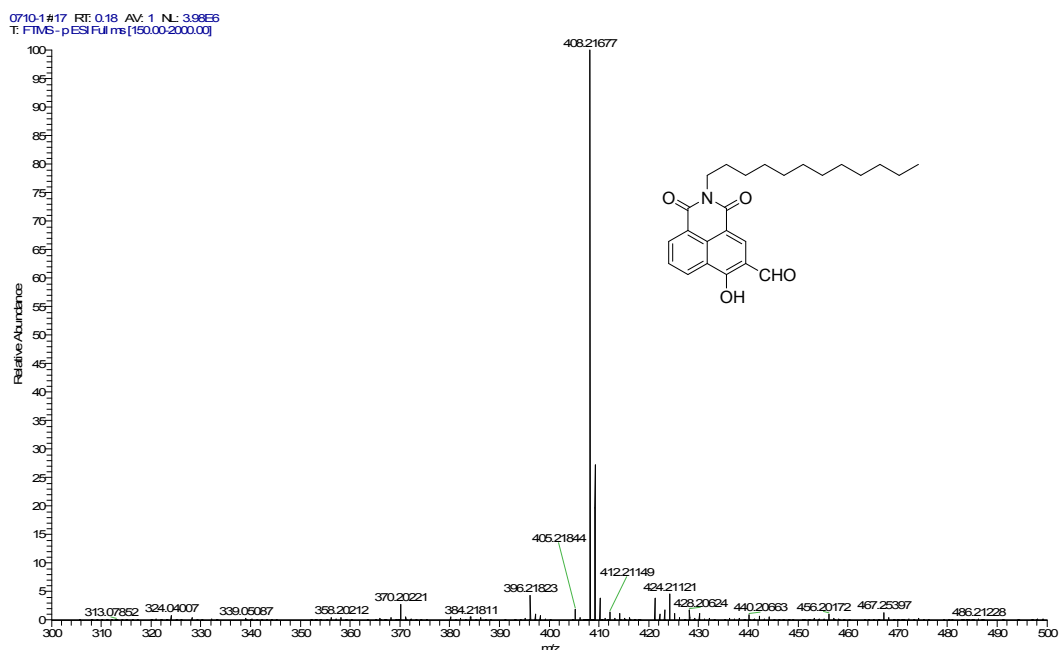

Fig. S11 HR-MS spectrum of compound 4.

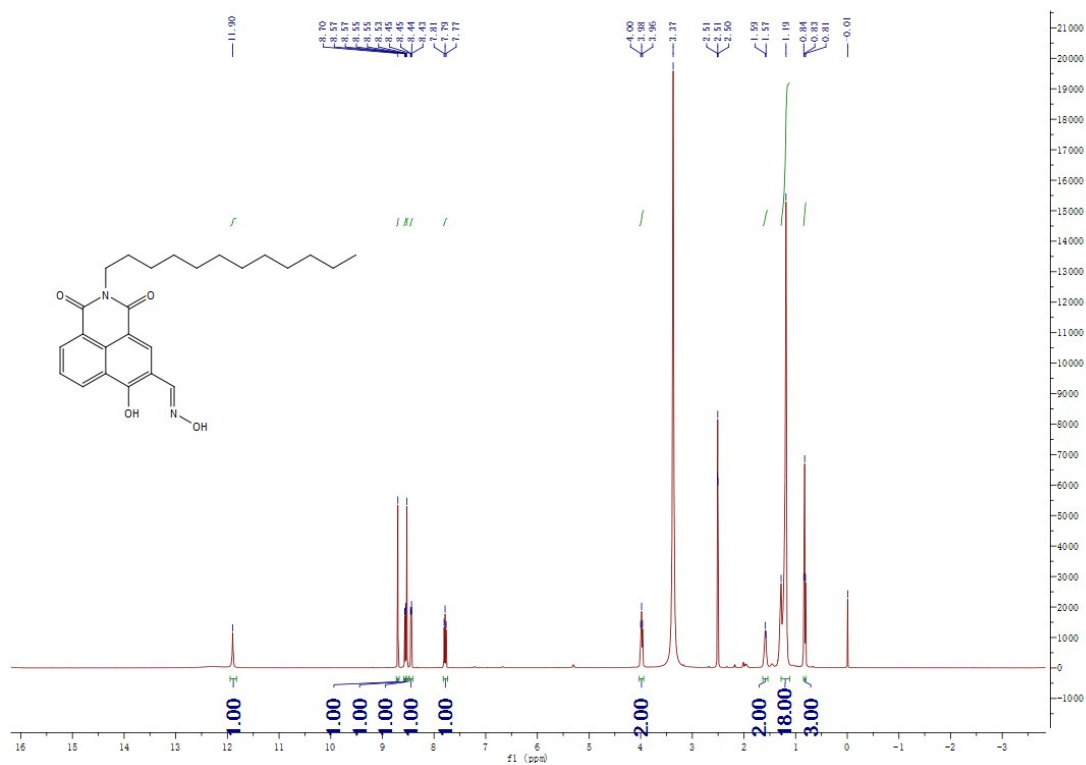

Fig. S12 <sup>1</sup>H-NMR spectrum of HODN.

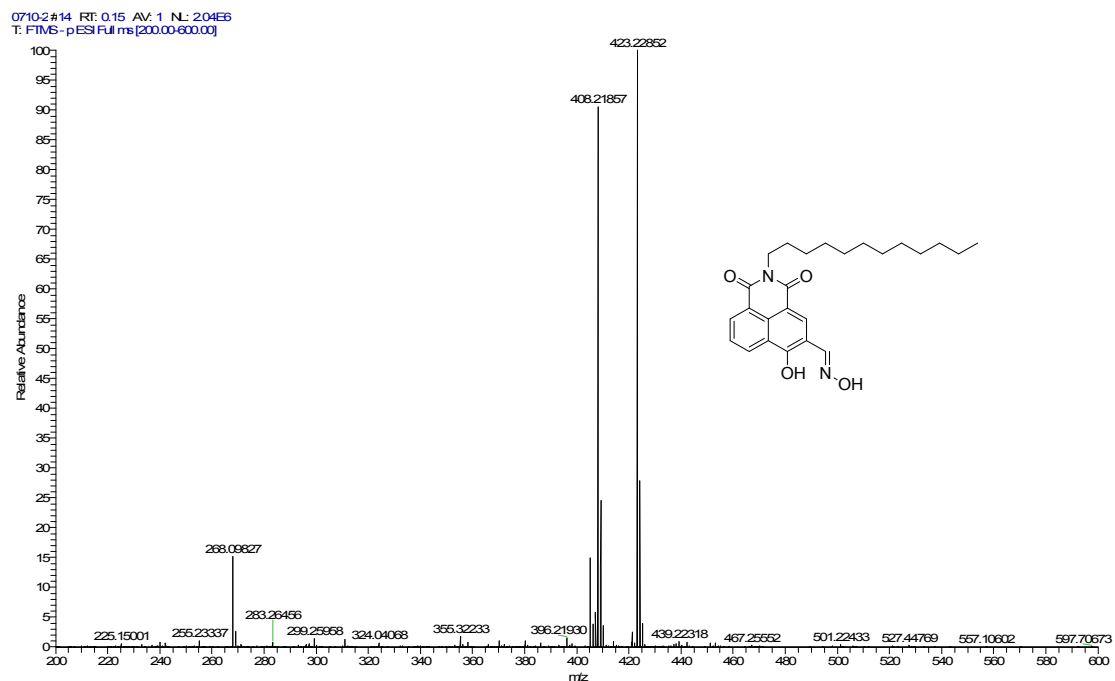

**Fig. S13** HR-MS spectrum of **HODN**, note that the peak located at  $m/z = 408$  was attributed to the residue of compound **4** in the LC-MS equipment.

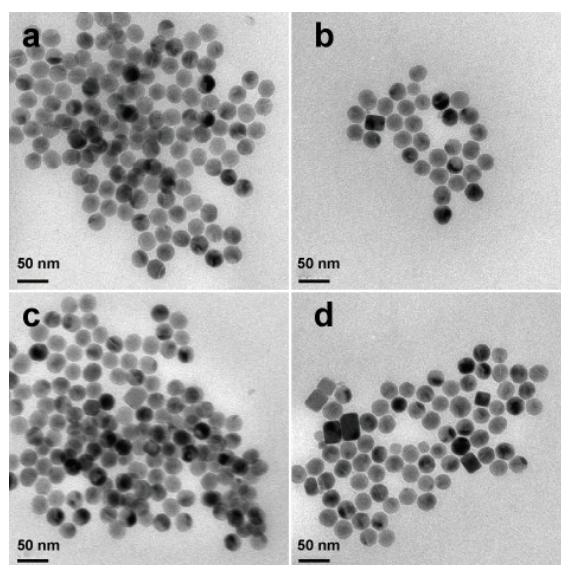

**Fig. S14** TEM images of OA-capped UCNPs (a, b, c) and Tween 20 modified UCNPs (d) captured under different horizons.
